# Supplementary material
Source: publisher figshare collection journal article supplement (https://rs.figshare.com/ndownloader/files/14331920)
Supplement: Supplementary file 1 [file 14331920]

## Sheet: Data
Worker ID	Colony ID	Order	Nest Orientation	NC 1	1BC E	1BC 1	1BC 2	2BC E	2BC 1	2BC 2	Time NC (s)	Time BC 1 (s)	Time BC 2 (s)		Colony ID key	Population Size Estimate	Average
1	4	BBN	L	r	r	r	l	r	r	l	n/a	n/a	n/a		1=88	20000	22000
2	4	BBN	L	r	c	r	l	c	l	r	n/a	n/a	n/a		2=87	22000
3	4	BBN	L	r	l	l	r	c	r	l	n/a	n/a	n/a		3=803	20000
4	4	BBN	L	r	l	l	l	c	l	r	n/a	n/a	n/a		4=98	20000
5	4	BBN	L	r	c	r	l	l	l	l	n/a	n/a	n/a		5=23	24000
6	4	BBN	L	r	l	r	l	l	r	l	n/a	n/a	n/a		6=26	26000
7	4	BBN	L	r	l	l	l	c	l	r	n/a	n/a	n/a
8	4	BBN	L	l	c	r	l	r	l	r	n/a	n/a	n/a		L	1
9	4	BBN	L	c	c	l	r	c	l	r	n/a	n/a	n/a		C	2
10	4	BBN	L	r	r	l	l	r	l	l	n/a	n/a	n/a		R	3
11	4	BBN	L	l	l	r	r	r	r	r	30.86	16.91	3.46
12	4	BBN	L	r	c	r	l	r	l	l	2.42	20.03	18.46
13	4	BBN	L	r	l	l	r	c	r	r	12.26	63.13	20.62
14	4	BBN	L	r	c	l	l	r	r	r	12.67	31.54	17.54
15	4	BBN	L	r	c	l	r	c	l	l	2.45	8.08	25.08
16	4	NBB	R	c	c	l	l	r	l	r	5.02	3.5	13.01
17	4	NBB	R	r	r	l	r	r	l	l	1.81	38.84	21.69
18	4	NBB	R	r	c	l	r	r	r	l	17.97	77.58	40.95
19	4	NBB	R	l	c	r	l	r	l	r	14.62	98.12	10.4
20	4	NBB	R	r	r	l	r	r	r	r	5.82	21.15	2.3
21	4	NBB	R	c	l	l	l	l	l	l	49.5	10.28	15.67
22	4	NBB	R	r	l	r	r	c	l	r	4.02	13.57	91.61
23	4	NBB	R	c	l	l	l	r	r	r	1.8	16.26	15.11
24	4	NBB	R	l	c	l	l	c	r	r	9.52	16.74	21.04
25	4	NBB	R	c	l	l	r	l	l	r	12.68	116.62	24.18
26	4	NBB	R	r	r	r	l	c	l	r	9.52	10.72	3.5
27	4	NBB	R	c	c	r	r	l	r	l	8.36	16.3	7.01
28	4	NBB	R	r	r	l	r	c	r	r	13.42	18.65	11.68
29	4	NBB	R	r	r	l	r	l	l	l	18.78	47.31	12.15
30	4	NBB	R	c	r	r	r	c	l	r	115.09	12.74	17.99
1	2	BBN	L	r	r	r	l	c	l	l	39.21	22.23	26.78
2	2	BBN	L	r	l	l	r	r	l	r	6.72	12.3	8.26
3	2	BBN	L	c	r	l	r	c	r	l	34.16	134.54	11.48
4	2	BBN	L	c	c	l	r	c	l	r	49.73	94.74	35.95
5	2	BBN	L	r	r	l	l	r	l	r	47.78	35.42	18.83
6	2	BBN	L	r	c	l	r	r	r	r	3.65	57.06	6.43
7	2	BBN	L	c	r	l	r	c	l	r	52.6	34.95	29.97
8	2	BBN	L	l	r	r	r	l	l	r	19.15	128.61	31.32
9	2	BBN	L	l	r	r	l	r	r	l	3.93	30.55	20.87
10	2	BBN	L	l	r	r	l	c	r	l	6.07	125.46	27.4
11	2	BBN	L	l	c	l	l	l	l	r	33.87	23.08	10.64
12	2	BBN	L	r	l	l	l	l	r	l	4.61	33.2	9.86
13	2	BBN	L	c	r	r	l	r	r	l	12.63	33.92	15.66
14	2	BBN	L	r	r	r	l	r	r	r	17.71	113.23	36.38
15	2	BBN	L	r	c	l	r	c	l	r	7.05	46.75	4.78
1	1	NBB	R	c	l	l	l	l	l	r	9.94	7.37	33.46
2	1	NBB	R	r	l	l	r	r	r	l	27.81	37.44	16.13
3	1	NBB	R	c	r	r	r	r	r	l	5.16	85.47	131.47
4	1	NBB	R	c	c	l	r	l	l	r	24.1	17.68	29.53
5	1	NBB	R	c	c	r	l	l	l	r	28.8	9.42	106.8
6	1	NBB	R	c	c	r	l	c	r	r	12.72	17.65	91.76
7	1	NBB	R	r	c	l	l	c	l	l	5.05	15.69	32.93
8	1	NBB	R	l	c	l	r	c	r	l	39.76	84.57	20.86
9	1	NBB	R	c	r	r	l	c	l	r	61.66	16.36	226.52
10	1	NBB	R	r	r	r	l	l	l	r	6.37	14.03	64.45
11	1	NBB	R	c	l	r	l	r	r	r	62.57	83.68	127.99
12	1	NBB	R	r	l	l	l	l	l	l	10.16	4.33	7.2
13	1	NBB	R	c	l	l	l	c	r	r	192.41	14.28	32.17
14	1	NBB	R	l	c	r	l	r	l	l	5.11	16.68	64.51
15	1	NBB	R	r	c	l	l	c	l	l	22.63	35.2	10.25
16	1	BBN	L	l	l	l	l	c	r	l	13.86	9.69	5.83
17	1	BBN	L	r	c	l	l	r	r	r	8.96	20.61	83.83
18	1	BBN	L	r	l	l	l	r	r	l	5.47	15.51	31.23
19	1	BBN	L	l	r	r	l	c	r	r	22	18.16	25.86
20	1	BBN	L	r	c	l	r	c	l	r	94.38	50.23	25.09
21	1	BBN	L	r	c	r	l	l	l	r	65.92	8.18	9.19
22	1	BBN	L	r	r	r	r	c	l	r	10.98	29.98	10.75
23	1	BBN	L	c	l	l	r	l	r	l	42.15	5.52	6.57
24	1	BBN	L	l	c	r	l	l	l	r	17.64	199.63	290.66
25	1	BBN	L	r	c	l	r	r	r	l	43.25	26.66	17.39
26	1	BBN	L	l	l	r	l	l	r	l	5.95	6.73	10.25
27	1	BBN	L	l	c	l	r	c	l	r	21.63	5.88	3.81
28	1	BBN	L	r	r	r	r	r	l	r	3.51	48.28	14.71
29	1	BBN	L	r	c	r	l	l	l	r	7.28	79.13	6.72
30	1	BBN	L	r	c	l	l	c	r	r	4.71	48.7	12.53
1	3	BBN	L	c	c	l	r	c	l	l	11.69	3.72	12.51
2	3	BBN	L	l	r	r	l	r	r	l	14.47	20.35	40.56
3	3	BBN	L	r	l	r	l	r	r	l	8.45	11.69	8.8
4	3	BBN	L	r	l	l	l	l	l	r	13.25	15.13	24.88
5	3	BBN	L	l	l	r	l	c	r	l	6.07	12.41	12.43
6	3	BBN	L	l	r	l	r	c	l	r	73.04	11.48	5.22
7	3	BBN	L	c	l	l	r	l	r	r	11.34	5.07	7.02
8	3	BBN	L	r	r	l	l	l	l	r	6.83	7.79	10.73
9	3	BBN	L	r	c	r	l	c	r	r	12.38	9.1	6.76
10	3	BBN	L	c	r	l	l	r	l	r	20.71	39.53	22.4
11	3	BBN	L	r	c	r	r	c	l	r	16.16	40.38	39.34
12	3	BBN	L	c	c	l	r	c	r	l	14.95	41.39	25.22
13	3	BBN	L	c	c	r	r	c	l	r	35.62	4.25	13.4
14	3	BBN	L	l	c	l	r	r	r	r	7.21	4.3	9.98
15	3	BBN	L	c	r	l	r	r	l	l	6.34	22.33	26.17
16	3	NBB	R	r	c	l	r	c	l	r	5.53	5.93	14.2
17	3	NBB	R	r	c	l	r	c	r	l	9.11	5.18	12.55
18	3	NBB	R	l	l	l	r	c	l	r	6.41	7.87	5.18
19	3	NBB	R	r	l	r	l	r	r	r	25.8	33.67	3.38
20	3	NBB	R	c	c	r	l	c	l	r	12.04	5.19	4.83
21	3	NBB	R	l	l	l	r	c	l	r	24.51	24.98	7.23
22	3	NBB	R	r	r	l	r	c	r	r	6.91	13.85	107.73
23	3	NBB	R	l	r	r	l	r	r	l	5.38	30.41	12.06
24	3	NBB	R	c	c	l	l	c	r	l	33.44	6.88	5.23
25	3	NBB	R	r	c	r	l	c	l	l	5.48	3.78	59.26
26	3	NBB	R	r	r	l	r	r	l	l	3.82	5.19	24.6
27	3	NBB	R	r	c	r	l	c	l	r	12.46	11.71	17.4
28	3	NBB	R	r	c	r	l	c	l	l	5.03	22.87	84.33
29	3	NBB	R	c	c	l	r	l	l	l	26.06	5.1	22.22
30	3	NBB	R	r	c	r	l	c	r	r	7.51	5.95	24.29
1	5	BBN	L	c	r	r	l	c	l	l	13.3	11.66	17.31
2	5	BBN	L	r	c	l	l	c	l	l	5.72	4.7	14.96
3	5	BBN	L	c	c	l	r	c	l	r	32.56	17.25	39.73
4	5	BBN	L	l	c	l	r	c	l	l	5.45	26.11	8.06
5	5	BBN	L	c	c	r	r	c	l	r	24.33	15.81	47.14
6	5	BBN	L	r	c	r	l	c	l	r	41.96	24.1	4.8
7	5	BBN	L	l	r	r	l	c	r	r	28.21	39.45	16.33
8	5	BBN	L	r	c	l	l	c	l	l	30.49	72.41	47.34
9	5	BBN	L	c	r	r	l	c	r	l	33.63	137.11	20.28
10	5	BBN	L	c	l	l	l	c	r	r	19.43	10.68	15.76
11	5	BBN	L	c	l	l	l	r	l	l	47.17	60.97	173.17
12	5	BBN	L	r	l	r	l	c	l	r	8.48	34.2	22.23
13	5	BBN	L	l	r	l	l	l	l	r	13.03	37.14	26.78
14	5	BBN	L	r	c	r	l	r	l	r	3.25	125.28	11.38
15	5	BBN	L	l	r	l	l	c	l	l	13.76	45.33	5.87
16	5	NBB	R	r	c	l	l	r	l	r	4.56	30.93	19.11
17	5	NBB	R	l	r	r	l	r	l	r	2.75	4.19	29.79
18	5	NBB	R	r	l	r	r	c	l	r	7.46	10.73	21.8
19	5	NBB	R	r	c	r	l	r	l	r	2.05	6.03	156.16
20	5	NBB	R	r	c	r	l	c	l	l	4.43	7.18	36.29
21	5	NBB	R	c	c	r	l	l	l	l	14.16	32.05	9.68
22	5	NBB	R	l	c	l	r	c	r	l	5.6	9.56	5.91
23	5	NBB	R	r	c	r	l	l	r	l	4.67	20.61	94.28
24	5	NBB	R	l	c	l	l	l	r	l	4.4	4.51	8.35
25	5	NBB	R	c	c	l	r	c	l	r	42.21	20.52	32.41
26	5	NBB	R	r	l	r	l	l	l	r	3.5	8.6	6.61
27	5	NBB	R	l	l	r	l	c	l	r	12.69	7.37	25.53
28	5	NBB	R	r	c	l	l	r	r	l	3.16	13.39	64.47
29	5	NBB	R	r	c	l	l	l	r	l	3.58	8.3	5.6
30	5	NBB	R	c	r	r	l	l	r	l	69.05	15.31	29.71
16	2	NBB	R	r	r	r	l	c	l	r	13.1	52.67	10.32
17	2	NBB	R	r	l	r	l	c	r	l	27.52	22.48	8.22
18	2	NBB	R	r	c	r	r	c	l	r	7.68	5.16	47.63
19	2	NBB	R	c	l	r	r	l	l	r	5.13	7.73	22.46
20	2	NBB	R	c	c	r	l	l	l	r	7.92	43.2	48.28
21	2	NBB	R	c	r	r	r	c	l	l	10.74	63.3	3.96
22	2	NBB	R	c	c	r	r	c	l	r	15.94	109.28	78.94
23	2	NBB	R	r	r	l	r	l	r	r	29.95	36.62	44.49
24	2	NBB	R	c	c	r	l	c	l	r	4.34	6.04	7.32
25	2	NBB	R	l	l	r	r	c	r	r	26.03	6.63	13.31
26	2	NBB	R	l	r	l	r	r	r	l	8.53	62.42	42.5
27	2	NBB	R	c	r	l	r	r	r	l	6.28	13.52	12.58
28	2	NBB	R	c	c	l	l	r	r	l	32.7	8.06	6.58
29	2	NBB	R	c	c	l	r	c	r	r	5.66	69.41	20.56
30	2	NBB	R	r	l	l	l	c	l	r	37.61	13.88	46.56
1	6	BBN	L	c	c	l	r	c	r	l	9.4	26.78	21.04
2	6	BBN	L	c	r	r	l	r	r	r	10.6	26.57	28.06
3	6	BBN	L	c	c	l	r	c	l	r	6.73	57.59	15.71
4	6	BBN	L	r	c	l	r	l	r	l	21.33	36.26	17.03
5	6	BBN	L	c	l	l	r	l	l	r	14.23	88.83	20.05
6	6	BBN	L	l	c	r	l	c	l	l	11.88	42.42	7.36
7	6	BBN	L	c	c	l	l	c	r	l	44.58	22.31	12.23
8	6	BBN	L	r	c	r	l	c	r	r	57.9	66.22	84.93
9	6	BBN	L	r	r	l	l	c	r	l	10.43	21.79	5.55
10	6	BBN	L	c	r	l	l	c	l	r	54.1	55.25	5.33
11	6	BBN	L	r	c	l	r	c	r	l	29.4	9.59	23.64
12	6	BBN	L	c	c	r	l	c	l	r	34.44	21.75	17.83
13	6	BBN	L	l	c	r	l	r	r	l	4.01	86.96	10.31
14	6	BBN	L	c	c	r	l	c	l	l	40.3	16.68	10.98
15	6	BBN	L	r	l	l	r	l	r	l	29.16	23.88	5.06
16	6	NBB	R	r	c	l	l	r	r	r	6.93	14.65	4.3
17	6	NBB	R	l	l	l	r	l	r	l	13.26	3.5	22.83
18	6	NBB	R	c	c	l	l	c	l	r	6.83	13.72	21.48
19	6	NBB	R	r	l	r	l	r	r	r	74.7	80.33	95.68
20	6	NBB	R	r	l	l	r	l	r	l	29.11	4.46	27.02
21	6	NBB	R	c	c	l	r	c	r	l	7.76	19.55	2.68
22	6	NBB	R	r	r	r	l	l	l	r	6.66	4.92	16.8
23	6	NBB	R	c	c	l	r	r	l	r	20.33	148.04	169.19
24	6	NBB	R	r	r	r	r	l	r	l	7.65	6.25	24.82
25	6	NBB	R	r	c	r	l	r	l	r	30.95	7.61	130.63
26	6	NBB	R	c	l	l	r	c	l	r	24.81	9.08	7.75
27	6	NBB	R	c	r	l	r	l	r	l	7.72	5.65	16.55
28	6	NBB	R	r	l	l	l	l	l	r	7.63	4.89	9.84
29	6	NBB	R	r	r	r	l	r	r	l	4.63	10.23	18.63
30	6	NBB	R	r	l	r	r	l	r	l	1.99	18.88	4.56

## Sheet: Colony Contingency Table
Colony ID	Left final choices	Right final choices	Central final choices		Worker ID	Colony ID	Order	Nest Orientation	NC 1	1BC E	1BC 1	1BC 2	2BC E	2BC 1	2BC 2	Time NC (s)	Time BC 1 (s)	Time BC 2 (s)
1	7	14	9		1	1	NBB	R	c	l	l	l	l	l	r	9.94	7.37	33.46
2	6	12	12		3	1	NBB	R	c	r	r	r	r	r	l	5.16	85.47	131.47
3	7	14	9		4	1	NBB	R	c	c	l	r	l	l	r	24.1	17.68	29.53
4	4	19	7		5	1	NBB	R	c	c	r	l	l	l	r	28.8	9.42	106.8
5	8	13	9		6	1	NBB	R	c	c	r	l	c	r	r	12.72	17.65	91.76
6	3	14	13		9	1	NBB	R	c	r	r	l	c	l	r	61.66	16.36	226.52
					11	1	NBB	R	c	l	r	l	r	r	r	62.57	83.68	127.99
					13	1	NBB	R	c	l	l	l	c	r	r	192.41	14.28	32.17
					23	1	BBN	L	c	l	l	r	l	r	l	42.15	5.52	6.57
					8	1	NBB	R	l	c	l	r	c	r	l	39.76	84.57	20.86
					14	1	NBB	R	l	c	r	l	r	l	l	5.11	16.68	64.51
					16	1	BBN	L	l	l	l	l	c	r	l	13.86	9.69	5.83
					19	1	BBN	L	l	r	r	l	c	r	r	22	18.16	25.86
					24	1	BBN	L	l	c	r	l	l	l	r	17.64	199.63	290.66
					26	1	BBN	L	l	l	r	l	l	r	l	5.95	6.73	10.25
					27	1	BBN	L	l	c	l	r	c	l	r	21.63	5.88	3.81
					2	1	NBB	R	r	l	l	r	r	r	l	27.81	37.44	16.13
					7	1	NBB	R	r	c	l	l	c	l	l	5.05	15.69	32.93
					10	1	NBB	R	r	r	r	l	l	l	r	6.37	14.03	64.45
					12	1	NBB	R	r	l	l	l	l	l	l	10.16	4.33	7.2
					15	1	NBB	R	r	c	l	l	c	l	l	22.63	35.2	10.25
					17	1	BBN	L	r	c	l	l	r	r	r	8.96	20.61	83.83
					18	1	BBN	L	r	l	l	l	r	r	l	5.47	15.51	31.23
					20	1	BBN	L	r	c	l	r	c	l	r	94.38	50.23	25.09
					21	1	BBN	L	r	c	r	l	l	l	r	65.92	8.18	9.19
					22	1	BBN	L	r	r	r	r	c	l	r	10.98	29.98	10.75
					25	1	BBN	L	r	c	l	r	r	r	l	43.25	26.66	17.39
					28	1	BBN	L	r	r	r	r	r	l	r	3.51	48.28	14.71
					29	1	BBN	L	r	c	r	l	l	l	r	7.28	79.13	6.72
					30	1	BBN	L	r	c	l	l	c	r	r	4.71	48.7	12.53
					3	2	BBN	L	c	r	l	r	c	r	l	34.16	134.54	11.48
					4	2	BBN	L	c	c	l	r	c	l	r	49.73	94.74	35.95
					7	2	BBN	L	c	r	l	r	c	l	r	52.6	34.95	29.97
					13	2	BBN	L	c	r	r	l	r	r	l	12.63	33.92	15.66
					19	2	NBB	R	c	l	r	r	l	l	r	5.13	7.73	22.46
					20	2	NBB	R	c	c	r	l	l	l	r	7.92	43.2	48.28
					21	2	NBB	R	c	r	r	r	c	l	l	10.74	63.3	3.96
					22	2	NBB	R	c	c	r	r	c	l	r	15.94	109.28	78.94
					24	2	NBB	R	c	c	r	l	c	l	r	4.34	6.04	7.32
					27	2	NBB	R	c	r	l	r	r	r	l	6.28	13.52	12.58
					28	2	NBB	R	c	c	l	l	r	r	l	32.7	8.06	6.58
					29	2	NBB	R	c	c	l	r	c	r	r	5.66	69.41	20.56
					8	2	BBN	L	l	r	r	r	l	l	r	19.15	128.61	31.32
					9	2	BBN	L	l	r	r	l	r	r	l	3.93	30.55	20.87
					10	2	BBN	L	l	r	r	l	c	r	l	6.07	125.46	27.4
					11	2	BBN	L	l	c	l	l	l	l	r	33.87	23.08	10.64
					25	2	NBB	R	l	l	r	r	c	r	r	26.03	6.63	13.31
					26	2	NBB	R	l	r	l	r	r	r	l	8.53	62.42	42.5
					1	2	BBN	L	r	r	r	l	c	l	l	39.21	22.23	26.78
					2	2	BBN	L	r	l	l	r	r	l	r	6.72	12.3	8.26
					5	2	BBN	L	r	r	l	l	r	l	r	47.78	35.42	18.83
					6	2	BBN	L	r	c	l	r	r	r	r	3.65	57.06	6.43
					12	2	BBN	L	r	l	l	l	l	r	l	4.61	33.2	9.86
					14	2	BBN	L	r	r	r	l	r	r	r	17.71	113.23	36.38
					15	2	BBN	L	r	c	l	r	c	l	r	7.05	46.75	4.78
					16	2	NBB	R	r	r	r	l	c	l	r	13.1	52.67	10.32
					17	2	NBB	R	r	l	r	l	c	r	l	27.52	22.48	8.22
					18	2	NBB	R	r	c	r	r	c	l	r	7.68	5.16	47.63
					23	2	NBB	R	r	r	l	r	l	r	r	29.95	36.62	44.49
					30	2	NBB	R	r	l	l	l	c	l	r	37.61	13.88	46.56
					1	3	BBN	L	c	c	l	r	c	l	l	11.69	3.72	12.51
					7	3	BBN	L	c	l	l	r	l	r	r	11.34	5.07	7.02
					10	3	BBN	L	c	r	l	l	r	l	r	20.71	39.53	22.4
					12	3	BBN	L	c	c	l	r	c	r	l	14.95	41.39	25.22
					13	3	BBN	L	c	c	r	r	c	l	r	35.62	4.25	13.4
					15	3	BBN	L	c	r	l	r	r	l	l	6.34	22.33	26.17
					20	3	NBB	R	c	c	r	l	c	l	r	12.04	5.19	4.83
					24	3	NBB	R	c	c	l	l	c	r	l	33.44	6.88	5.23
					29	3	NBB	R	c	c	l	r	l	l	l	26.06	5.1	22.22
					2	3	BBN	L	l	r	r	l	r	r	l	14.47	20.35	40.56
					5	3	BBN	L	l	l	r	l	c	r	l	6.07	12.41	12.43
					6	3	BBN	L	l	r	l	r	c	l	r	73.04	11.48	5.22
					14	3	BBN	L	l	c	l	r	r	r	r	7.21	4.3	9.98
					18	3	NBB	R	l	l	l	r	c	l	r	6.41	7.87	5.18
					21	3	NBB	R	l	l	l	r	c	l	r	24.51	24.98	7.23
					23	3	NBB	R	l	r	r	l	r	r	l	5.38	30.41	12.06
					3	3	BBN	L	r	l	r	l	r	r	l	8.45	11.69	8.8
					4	3	BBN	L	r	l	l	l	l	l	r	13.25	15.13	24.88
					8	3	BBN	L	r	r	l	l	l	l	r	6.83	7.79	10.73
					9	3	BBN	L	r	c	r	l	c	r	r	12.38	9.1	6.76
					11	3	BBN	L	r	c	r	r	c	l	r	16.16	40.38	39.34
					16	3	NBB	R	r	c	l	r	c	l	r	5.53	5.93	14.2
					17	3	NBB	R	r	c	l	r	c	r	l	9.11	5.18	12.55
					19	3	NBB	R	r	l	r	l	r	r	r	25.8	33.67	3.38
					22	3	NBB	R	r	r	l	r	c	r	r	6.91	13.85	107.73
					25	3	NBB	R	r	c	r	l	c	l	l	5.48	3.78	59.26
					26	3	NBB	R	r	r	l	r	r	l	l	3.82	5.19	24.6
					27	3	NBB	R	r	c	r	l	c	l	r	12.46	11.71	17.4
					28	3	NBB	R	r	c	r	l	c	l	l	5.03	22.87	84.33
					30	3	NBB	R	r	c	r	l	c	r	r	7.51	5.95	24.29
					9	4	BBN	L	c	c	l	r	c	l	r	n/a	n/a	n/a
					16	4	NBB	R	c	c	l	l	r	l	r	5.02	3.5	13.01
					21	4	NBB	R	c	l	l	l	l	l	l	49.5	10.28	15.67
					23	4	NBB	R	c	l	l	l	r	r	r	1.8	16.26	15.11
					25	4	NBB	R	c	l	l	r	l	l	r	12.68	116.62	24.18
					27	4	NBB	R	c	c	r	r	l	r	l	8.36	16.3	7.01
					30	4	NBB	R	c	r	r	r	c	l	r	115.09	12.74	17.99
					8	4	BBN	L	l	c	r	l	r	l	r	n/a	n/a	n/a
					11	4	BBN	L	l	l	r	r	r	r	r	30.86	16.91	3.46
					19	4	NBB	R	l	c	r	l	r	l	r	14.62	98.12	10.4
					24	4	NBB	R	l	c	l	l	c	r	r	9.52	16.74	21.04
					1	4	BBN	L	r	r	r	l	r	r	l	n/a	n/a	n/a
					2	4	BBN	L	r	c	r	l	c	l	r	n/a	n/a	n/a
					3	4	BBN	L	r	l	l	r	c	r	l	n/a	n/a	n/a
					4	4	BBN	L	r	l	l	l	c	l	r	n/a	n/a	n/a
					5	4	BBN	L	r	c	r	l	l	l	l	n/a	n/a	n/a
					6	4	BBN	L	r	l	r	l	l	r	l	n/a	n/a	n/a
					7	4	BBN	L	r	l	l	l	c	l	r	n/a	n/a	n/a
					10	4	BBN	L	r	r	l	l	r	l	l	n/a	n/a	n/a
					12	4	BBN	L	r	c	r	l	r	l	l	2.42	20.03	18.46
					13	4	BBN	L	r	l	l	r	c	r	r	12.26	63.13	20.62
					14	4	BBN	L	r	c	l	l	r	r	r	12.67	31.54	17.54
					15	4	BBN	L	r	c	l	r	c	l	l	2.45	8.08	25.08
					17	4	NBB	R	r	r	l	r	r	l	l	1.81	38.84	21.69
					18	4	NBB	R	r	c	l	r	r	r	l	17.97	77.58	40.95
					20	4	NBB	R	r	r	l	r	r	r	r	5.82	21.15	2.3
					22	4	NBB	R	r	l	r	r	c	l	r	4.02	13.57	91.61
					26	4	NBB	R	r	r	r	l	c	l	r	9.52	10.72	3.5
					28	4	NBB	R	r	r	l	r	c	r	r	13.42	18.65	11.68
					29	4	NBB	R	r	r	l	r	l	l	l	18.78	47.31	12.15
					1	5	BBN	L	c	r	r	l	c	l	l	13.3	11.66	17.31
					3	5	BBN	L	c	c	l	r	c	l	r	32.56	17.25	39.73
					5	5	BBN	L	c	c	r	r	c	l	r	24.33	15.81	47.14
					9	5	BBN	L	c	r	r	l	c	r	l	33.63	137.11	20.28
					10	5	BBN	L	c	l	l	l	c	r	r	19.43	10.68	15.76
					11	5	BBN	L	c	l	l	l	r	l	l	47.17	60.97	173.17
					21	5	NBB	R	c	c	r	l	l	l	l	14.16	32.05	9.68
					25	5	NBB	R	c	c	l	r	c	l	r	42.21	20.52	32.41
					30	5	NBB	R	c	r	r	l	l	r	l	69.05	15.31	29.71
					4	5	BBN	L	l	c	l	r	c	l	l	5.45	26.11	8.06
					7	5	BBN	L	l	r	r	l	c	r	r	28.21	39.45	16.33
					13	5	BBN	L	l	r	l	l	l	l	r	13.03	37.14	26.78
					15	5	BBN	L	l	r	l	l	c	l	l	13.76	45.33	5.87
					17	5	NBB	R	l	r	r	l	r	l	r	2.75	4.19	29.79
					22	5	NBB	R	l	c	l	r	c	r	l	5.6	9.56	5.91
					24	5	NBB	R	l	c	l	l	l	r	l	4.4	4.51	8.35
					27	5	NBB	R	l	l	r	l	c	l	r	12.69	7.37	25.53
					2	5	BBN	L	r	c	l	l	c	l	l	5.72	4.7	14.96
					6	5	BBN	L	r	c	r	l	c	l	r	41.96	24.1	4.8
					8	5	BBN	L	r	c	l	l	c	l	l	30.49	72.41	47.34
					12	5	BBN	L	r	l	r	l	c	l	r	8.48	34.2	22.23
					14	5	BBN	L	r	c	r	l	r	l	r	3.25	125.28	11.38
					16	5	NBB	R	r	c	l	l	r	l	r	4.56	30.93	19.11
					18	5	NBB	R	r	l	r	r	c	l	r	7.46	10.73	21.8
					19	5	NBB	R	r	c	r	l	r	l	r	2.05	6.03	156.16
					20	5	NBB	R	r	c	r	l	c	l	l	4.43	7.18	36.29
					23	5	NBB	R	r	c	r	l	l	r	l	4.67	20.61	94.28
					26	5	NBB	R	r	l	r	l	l	l	r	3.5	8.6	6.61
					28	5	NBB	R	r	c	l	l	r	r	l	3.16	13.39	64.47
					29	5	NBB	R	r	c	l	l	l	r	l	3.58	8.3	5.6
					1	6	BBN	L	c	c	l	r	c	r	l	9.4	26.78	21.04
					2	6	BBN	L	c	r	r	l	r	r	r	10.6	26.57	28.06
					3	6	BBN	L	c	c	l	r	c	l	r	6.73	57.59	15.71
					5	6	BBN	L	c	l	l	r	l	l	r	14.23	88.83	20.05
					7	6	BBN	L	c	c	l	l	c	r	l	44.58	22.31	12.23
					10	6	BBN	L	c	r	l	l	c	l	r	54.1	55.25	5.33
					12	6	BBN	L	c	c	r	l	c	l	r	34.44	21.75	17.83
					14	6	BBN	L	c	c	r	l	c	l	l	40.3	16.68	10.98
					18	6	NBB	R	c	c	l	l	c	l	r	6.83	13.72	21.48
					21	6	NBB	R	c	c	l	r	c	r	l	7.76	19.55	2.68
					23	6	NBB	R	c	c	l	r	r	l	r	20.33	148.04	169.19
					26	6	NBB	R	c	l	l	r	c	l	r	24.81	9.08	7.75
					27	6	NBB	R	c	r	l	r	l	r	l	7.72	5.65	16.55
					6	6	BBN	L	l	c	r	l	c	l	l	11.88	42.42	7.36
					13	6	BBN	L	l	c	r	l	r	r	l	4.01	86.96	10.31
					17	6	NBB	R	l	l	l	r	l	r	l	13.26	3.5	22.83
					4	6	BBN	L	r	c	l	r	l	r	l	21.33	36.26	17.03
					8	6	BBN	L	r	c	r	l	c	r	r	57.9	66.22	84.93
					9	6	BBN	L	r	r	l	l	c	r	l	10.43	21.79	5.55
					11	6	BBN	L	r	c	l	r	c	r	l	29.4	9.59	23.64
					15	6	BBN	L	r	l	l	r	l	r	l	29.16	23.88	5.06
					16	6	NBB	R	r	c	l	l	r	r	r	6.93	14.65	4.3
					19	6	NBB	R	r	l	r	l	r	r	r	74.7	80.33	95.68
					20	6	NBB	R	r	l	l	r	l	r	l	29.11	4.46	27.02
					22	6	NBB	R	r	r	r	l	l	l	r	6.66	4.92	16.8
					24	6	NBB	R	r	r	r	r	l	r	l	7.65	6.25	24.82
					25	6	NBB	R	r	c	r	l	r	l	r	30.95	7.61	130.63
					28	6	NBB	R	r	l	l	l	l	l	r	7.63	4.89	9.84
					29	6	NBB	R	r	r	r	l	r	r	l	4.63	10.23	18.63
					30	6	NBB	R	r	l	r	r	l	r	l	1.99	18.88	4.56

## Sheet: Choice and Decision Time
Worker ID	Colony ID	Order	Nest Orientation	NC 1	1BC E	1BC 1	1BC 2	2BC E	2BC 1	2BC 2	Time NC (s)	Time BC 1 (s)	Time BC 2 (s)		Correlations		Time NC	Time BC 1	Time BC 2
1	1	NBB	R	2	1	1	1	1	1	3	9.94	7.37	33.46		Time NC	Sig. (2-tailed)	N/A	0.009*	0.299
3	1	NBB	R	2	3	3	3	3	3	1	5.16	85.47	131.47		Time BC 1	Sig. (2-tailed)	0.009*	N/A	0.037*
4	1	NBB	R	2	2	1	3	1	1	3	24.1	17.68	29.53		Time BC 2	Sig. (2-tailed)	0.299	0.037*	N/A
5	1	NBB	R	2	2	3	1	1	1	3	28.8	9.42	106.8				*=P<0.05
6	1	NBB	R	2	2	3	1	2	3	3	12.72	17.65	91.76
9	1	NBB	R	2	3	3	1	2	1	3	61.66	16.36	226.52
11	1	NBB	R	2	1	3	1	3	3	3	62.57	83.68	127.99
13	1	NBB	R	2	1	1	1	2	3	3	192.41	14.28	32.17
23	1	BBN	L	2	1	1	3	1	3	1	42.15	5.52	6.57
3	2	BBN	L	2	3	1	3	2	3	1	34.16	134.54	11.48
4	2	BBN	L	2	2	1	3	2	1	3	49.73	94.74	35.95
7	2	BBN	L	2	3	1	3	2	1	3	52.6	34.95	29.97
13	2	BBN	L	2	3	3	1	3	3	1	12.63	33.92	15.66
19	2	NBB	R	2	1	3	3	1	1	3	5.13	7.73	22.46
20	2	NBB	R	2	2	3	1	1	1	3	7.92	43.2	48.28
21	2	NBB	R	2	3	3	3	2	1	1	10.74	63.3	3.96
22	2	NBB	R	2	2	3	3	2	1	3	15.94	109.28	78.94
24	2	NBB	R	2	2	3	1	2	1	3	4.34	6.04	7.32
27	2	NBB	R	2	3	1	3	3	3	1	6.28	13.52	12.58
28	2	NBB	R	2	2	1	1	3	3	1	32.7	8.06	6.58
29	2	NBB	R	2	2	1	3	2	3	3	5.66	69.41	20.56
1	3	BBN	L	2	2	1	3	2	1	1	11.69	3.72	12.51
7	3	BBN	L	2	1	1	3	1	3	3	11.34	5.07	7.02
10	3	BBN	L	2	3	1	1	3	1	3	20.71	39.53	22.4
12	3	BBN	L	2	2	1	3	2	3	1	14.95	41.39	25.22
13	3	BBN	L	2	2	3	3	2	1	3	35.62	4.25	13.4
15	3	BBN	L	2	3	1	3	3	1	1	6.34	22.33	26.17
20	3	NBB	R	2	2	3	1	2	1	3	12.04	5.19	4.83
24	3	NBB	R	2	2	1	1	2	3	1	33.44	6.88	5.23
29	3	NBB	R	2	2	1	3	1	1	1	26.06	5.1	22.22
9	4	BBN	L	2	2	1	3	2	1	3	n/a	n/a	n/a
16	4	NBB	R	2	2	1	1	3	1	3	5.02	3.5	13.01
21	4	NBB	R	2	1	1	1	1	1	1	49.5	10.28	15.67
23	4	NBB	R	2	1	1	1	3	3	3	1.8	16.26	15.11
25	4	NBB	R	2	1	1	3	1	1	3	12.68	116.62	24.18
27	4	NBB	R	2	2	3	3	1	3	1	8.36	16.3	7.01
30	4	NBB	R	2	3	3	3	2	1	3	115.09	12.74	17.99
1	5	BBN	L	2	3	3	1	2	1	1	13.3	11.66	17.31
3	5	BBN	L	2	2	1	3	2	1	3	32.56	17.25	39.73
5	5	BBN	L	2	2	3	3	2	1	3	24.33	15.81	47.14
9	5	BBN	L	2	3	3	1	2	3	1	33.63	137.11	20.28
10	5	BBN	L	2	1	1	1	2	3	3	19.43	10.68	15.76
11	5	BBN	L	2	1	1	1	3	1	1	47.17	60.97	173.17
21	5	NBB	R	2	2	3	1	1	1	1	14.16	32.05	9.68
25	5	NBB	R	2	2	1	3	2	1	3	42.21	20.52	32.41
30	5	NBB	R	2	3	3	1	1	3	1	69.05	15.31	29.71
1	6	BBN	L	2	2	1	3	2	3	1	9.4	26.78	21.04
2	6	BBN	L	2	3	3	1	3	3	3	10.6	26.57	28.06
3	6	BBN	L	2	2	1	3	2	1	3	6.73	57.59	15.71
5	6	BBN	L	2	1	1	3	1	1	3	14.23	88.83	20.05
7	6	BBN	L	2	2	1	1	2	3	1	44.58	22.31	12.23
10	6	BBN	L	2	3	1	1	2	1	3	54.1	55.25	5.33
12	6	BBN	L	2	2	3	1	2	1	3	34.44	21.75	17.83
14	6	BBN	L	2	2	3	1	2	1	1	40.3	16.68	10.98
18	6	NBB	R	2	2	1	1	2	1	3	6.83	13.72	21.48
21	6	NBB	R	2	2	1	3	2	3	1	7.76	19.55	2.68
23	6	NBB	R	2	2	1	3	3	1	3	20.33	148.04	169.19
26	6	NBB	R	2	1	1	3	2	1	3	24.81	9.08	7.75
27	6	NBB	R	2	3	1	3	1	3	1	7.72	5.65	16.55
8	1	NBB	R	1	2	1	3	2	3	1	39.76	84.57	20.86
14	1	NBB	R	1	2	3	1	3	1	1	5.11	16.68	64.51
16	1	BBN	L	1	1	1	1	2	3	1	13.86	9.69	5.83
19	1	BBN	L	1	3	3	1	2	3	3	22	18.16	25.86
24	1	BBN	L	1	2	3	1	1	1	3	17.64	199.63	290.66
26	1	BBN	L	1	1	3	1	1	3	1	5.95	6.73	10.25
27	1	BBN	L	1	2	1	3	2	1	3	21.63	5.88	3.81
8	2	BBN	L	1	3	3	3	1	1	3	19.15	128.61	31.32
9	2	BBN	L	1	3	3	1	3	3	1	3.93	30.55	20.87
10	2	BBN	L	1	3	3	1	2	3	1	6.07	125.46	27.4
11	2	BBN	L	1	2	1	1	1	1	3	33.87	23.08	10.64
25	2	NBB	R	1	1	3	3	2	3	3	26.03	6.63	13.31
26	2	NBB	R	1	3	1	3	3	3	1	8.53	62.42	42.5
2	3	BBN	L	1	3	3	1	3	3	1	14.47	20.35	40.56
5	3	BBN	L	1	1	3	1	2	3	1	6.07	12.41	12.43
6	3	BBN	L	1	3	1	3	2	1	3	73.04	11.48	5.22
14	3	BBN	L	1	2	1	3	3	3	3	7.21	4.3	9.98
18	3	NBB	R	1	1	1	3	2	1	3	6.41	7.87	5.18
21	3	NBB	R	1	1	1	3	2	1	3	24.51	24.98	7.23
23	3	NBB	R	1	3	3	1	3	3	1	5.38	30.41	12.06
8	4	BBN	L	1	2	3	1	3	1	3	n/a	n/a	n/a
11	4	BBN	L	1	1	3	3	3	3	3	30.86	16.91	3.46
19	4	NBB	R	1	2	3	1	3	1	3	14.62	98.12	10.4
24	4	NBB	R	1	2	1	1	2	3	3	9.52	16.74	21.04
4	5	BBN	L	1	2	1	3	2	1	1	5.45	26.11	8.06
7	5	BBN	L	1	3	3	1	2	3	3	28.21	39.45	16.33
13	5	BBN	L	1	3	1	1	1	1	3	13.03	37.14	26.78
15	5	BBN	L	1	3	1	1	2	1	1	13.76	45.33	5.87
17	5	NBB	R	1	3	3	1	3	1	3	2.75	4.19	29.79
22	5	NBB	R	1	2	1	3	2	3	1	5.6	9.56	5.91
24	5	NBB	R	1	2	1	1	1	3	1	4.4	4.51	8.35
27	5	NBB	R	1	1	3	1	2	1	3	12.69	7.37	25.53
6	6	BBN	L	1	2	3	1	2	1	1	11.88	42.42	7.36
13	6	BBN	L	1	2	3	1	3	3	1	4.01	86.96	10.31
17	6	NBB	R	1	1	1	3	1	3	1	13.26	3.5	22.83
2	1	NBB	R	3	1	1	3	3	3	1	27.81	37.44	16.13
7	1	NBB	R	3	2	1	1	2	1	1	5.05	15.69	32.93
10	1	NBB	R	3	3	3	1	1	1	3	6.37	14.03	64.45
12	1	NBB	R	3	1	1	1	1	1	1	10.16	4.33	7.2
15	1	NBB	R	3	2	1	1	2	1	1	22.63	35.2	10.25
17	1	BBN	L	3	2	1	1	3	3	3	8.96	20.61	83.83
18	1	BBN	L	3	1	1	1	3	3	1	5.47	15.51	31.23
20	1	BBN	L	3	2	1	3	2	1	3	94.38	50.23	25.09
21	1	BBN	L	3	2	3	1	1	1	3	65.92	8.18	9.19
22	1	BBN	L	3	3	3	3	2	1	3	10.98	29.98	10.75
25	1	BBN	L	3	2	1	3	3	3	1	43.25	26.66	17.39
28	1	BBN	L	3	3	3	3	3	1	3	3.51	48.28	14.71
29	1	BBN	L	3	2	3	1	1	1	3	7.28	79.13	6.72
30	1	BBN	L	3	2	1	1	2	3	3	4.71	48.7	12.53
1	2	BBN	L	3	3	3	1	2	1	1	39.21	22.23	26.78
2	2	BBN	L	3	1	1	3	3	1	3	6.72	12.3	8.26
5	2	BBN	L	3	3	1	1	3	1	3	47.78	35.42	18.83
6	2	BBN	L	3	2	1	3	3	3	3	3.65	57.06	6.43
12	2	BBN	L	3	1	1	1	1	3	1	4.61	33.2	9.86
14	2	BBN	L	3	3	3	1	3	3	3	17.71	113.23	36.38
15	2	BBN	L	3	2	1	3	2	1	3	7.05	46.75	4.78
16	2	NBB	R	3	3	3	1	2	1	3	13.1	52.67	10.32
17	2	NBB	R	3	1	3	1	2	3	1	27.52	22.48	8.22
18	2	NBB	R	3	2	3	3	2	1	3	7.68	5.16	47.63
23	2	NBB	R	3	3	1	3	1	3	3	29.95	36.62	44.49
30	2	NBB	R	3	1	1	1	2	1	3	37.61	13.88	46.56
3	3	BBN	L	3	1	3	1	3	3	1	8.45	11.69	8.8
4	3	BBN	L	3	1	1	1	1	1	3	13.25	15.13	24.88
8	3	BBN	L	3	3	1	1	1	1	3	6.83	7.79	10.73
9	3	BBN	L	3	2	3	1	2	3	3	12.38	9.1	6.76
11	3	BBN	L	3	2	3	3	2	1	3	16.16	40.38	39.34
16	3	NBB	R	3	2	1	3	2	1	3	5.53	5.93	14.2
17	3	NBB	R	3	2	1	3	2	3	1	9.11	5.18	12.55
19	3	NBB	R	3	1	3	1	3	3	3	25.8	33.67	3.38
22	3	NBB	R	3	3	1	3	2	3	3	6.91	13.85	107.73
25	3	NBB	R	3	2	3	1	2	1	1	5.48	3.78	59.26
26	3	NBB	R	3	3	1	3	3	1	1	3.82	5.19	24.6
27	3	NBB	R	3	2	3	1	2	1	3	12.46	11.71	17.4
28	3	NBB	R	3	2	3	1	2	1	1	5.03	22.87	84.33
30	3	NBB	R	3	2	3	1	2	3	3	7.51	5.95	24.29
1	4	BBN	L	3	3	3	1	3	3	1	n/a	n/a	n/a
2	4	BBN	L	3	2	3	1	2	1	3	n/a	n/a	n/a
3	4	BBN	L	3	1	1	3	2	3	1	n/a	n/a	n/a
4	4	BBN	L	3	1	1	1	2	1	3	n/a	n/a	n/a
5	4	BBN	L	3	2	3	1	1	1	1	n/a	n/a	n/a
6	4	BBN	L	3	1	3	1	1	3	1	n/a	n/a	n/a
7	4	BBN	L	3	1	1	1	2	1	3	n/a	n/a	n/a
10	4	BBN	L	3	3	1	1	3	1	1	n/a	n/a	n/a
12	4	BBN	L	3	2	3	1	3	1	1	2.42	20.03	18.46
13	4	BBN	L	3	1	1	3	2	3	3	12.26	63.13	20.62
14	4	BBN	L	3	2	1	1	3	3	3	12.67	31.54	17.54
15	4	BBN	L	3	2	1	3	2	1	1	2.45	8.08	25.08
17	4	NBB	R	3	3	1	3	3	1	1	1.81	38.84	21.69
18	4	NBB	R	3	2	1	3	3	3	1	17.97	77.58	40.95
20	4	NBB	R	3	3	1	3	3	3	3	5.82	21.15	2.3
22	4	NBB	R	3	1	3	3	2	1	3	4.02	13.57	91.61
26	4	NBB	R	3	3	3	1	2	1	3	9.52	10.72	3.5
28	4	NBB	R	3	3	1	3	2	3	3	13.42	18.65	11.68
29	4	NBB	R	3	3	1	3	1	1	1	18.78	47.31	12.15
2	5	BBN	L	3	2	1	1	2	1	1	5.72	4.7	14.96
6	5	BBN	L	3	2	3	1	2	1	3	41.96	24.1	4.8
8	5	BBN	L	3	2	1	1	2	1	1	30.49	72.41	47.34
12	5	BBN	L	3	1	3	1	2	1	3	8.48	34.2	22.23
14	5	BBN	L	3	2	3	1	3	1	3	3.25	125.28	11.38
16	5	NBB	R	3	2	1	1	3	1	3	4.56	30.93	19.11
18	5	NBB	R	3	1	3	3	2	1	3	7.46	10.73	21.8
19	5	NBB	R	3	2	3	1	3	1	3	2.05	6.03	156.16
20	5	NBB	R	3	2	3	1	2	1	1	4.43	7.18	36.29
23	5	NBB	R	3	2	3	1	1	3	1	4.67	20.61	94.28
26	5	NBB	R	3	1	3	1	1	1	3	3.5	8.6	6.61
28	5	NBB	R	3	2	1	1	3	3	1	3.16	13.39	64.47
29	5	NBB	R	3	2	1	1	1	3	1	3.58	8.3	5.6
4	6	BBN	L	3	2	1	3	1	3	1	21.33	36.26	17.03
8	6	BBN	L	3	2	3	1	2	3	3	57.9	66.22	84.93
9	6	BBN	L	3	3	1	1	2	3	1	10.43	21.79	5.55
11	6	BBN	L	3	2	1	3	2	3	1	29.4	9.59	23.64
15	6	BBN	L	3	1	1	3	1	3	1	29.16	23.88	5.06
16	6	NBB	R	3	2	1	1	3	3	3	6.93	14.65	4.3
19	6	NBB	R	3	1	3	1	3	3	3	74.7	80.33	95.68
20	6	NBB	R	3	1	1	3	1	3	1	29.11	4.46	27.02
22	6	NBB	R	3	3	3	1	1	1	3	6.66	4.92	16.8
24	6	NBB	R	3	3	3	3	1	3	1	7.65	6.25	24.82
25	6	NBB	R	3	2	3	1	3	1	3	30.95	7.61	130.63
28	6	NBB	R	3	1	1	1	1	1	3	7.63	4.89	9.84
29	6	NBB	R	3	3	3	1	3	3	1	4.63	10.23	18.63
30	6	NBB	R	3	1	3	3	1	3	1	1.99	18.88	4.56

## Sheet: Thigmotaxis Incidence
Consecutive choices	Significance
Entrance left, choice 1 left	P=0.025
Entrance right, choice 1 right	P=0.011
Entrance centre, choice 1 left	P=0.026
Entrance centre, choice 1 right	P=0.856
Choice 1 left, choice 2 left	P=0.756
Choice 1 right, choice 2 right	P=0.255
